# Supplementary material for: The Long-Term Effect of Exposure to Particulate Matter Air Pollution on the Incidence of Myocardial Infarction: A Systematic Review and Meta-Analysis
Source: Research Square preprint supplement (doi:10.21203/rs.3.rs-440374/v1), 2021-04-26

**Supplemental Figure 4.** Forest plot for the association between Particulate matter (PM) air pollution with aerodynamic  $\leq 10 \mu\text{m}$  and the risk of myocardial infarction (MI) according to the study population (with or without CVDs). CVDs, cardiovascular diseases; HR, hazard ratio; CI, confidence interval.

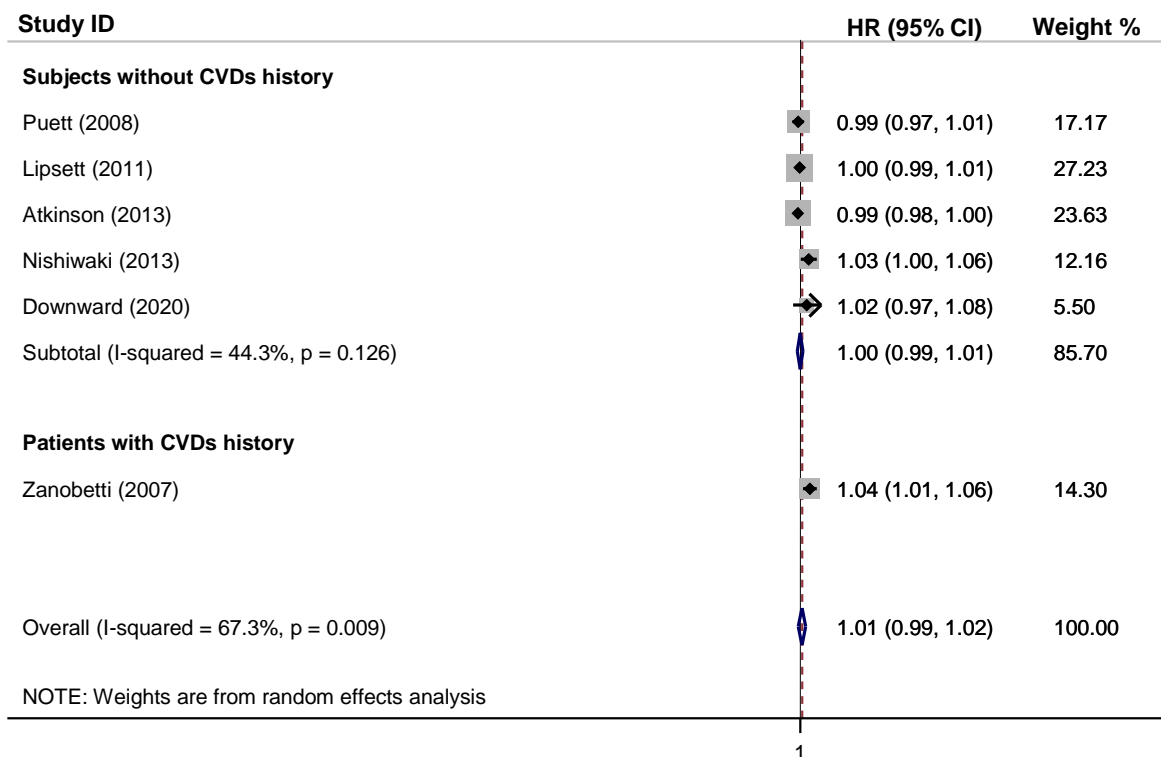

Supplement: Supplementary file 1 [file 57c3c06d9d119268d9ca908c.pdf]
